# Supplementary material for: Effects of Recirculating Aquaculture System Wastewater on Anammox Performance and Community Structure
Source: MDPI journal article supplement (doi:10.3390/pr9071183), 2021-07-07
Supplement: s1 [file s1]

## Effects of Recirculating Aquaculture System Wastewater on Anammox Performance and Community Structure

Jonathan A. C. Roques <sup>1,2,†</sup>, Federico Micolucci <sup>1,2,†</sup>, Suguru Hosokawa <sup>3</sup>, Kristina Sundell <sup>1,2</sup> and Tomonori Kindaichi <sup>3,\*</sup>

**Table S1.** Comparison of TE concentrations.

| TE | SEALIFE <sup>1</sup><br>( $\mu\text{g L}^{-1}$ ) | TE Mix <sup>2</sup><br>( $\mu\text{g L}^{-1}$ ) |
|----|--------------------------------------------------|-------------------------------------------------|
| B  | 3800                                             | 2.4                                             |
| Co | 0.26                                             | 59.4                                            |
| Cu | 2.9                                              | 63.6                                            |
| Fe | 6.9                                              | 1838                                            |
| Mn | 3.8                                              | 274.8                                           |
| Mo | 5.2                                              | 87.2                                            |
| Ni | 1.9                                              | 46.9                                            |
| Se | <20                                              | 44.9                                            |
| Zn | 4.2                                              | 97.8                                            |

<sup>1</sup>SEALIFE, artificial sea salt (Marinotech, Tokyo, Japan), analyzed by Shimadzu Techno-Research Inc., Kyoto, Japan. B concentration was measured with Inductively Coupled Plasma (ICP) Emission Spectroscopy (ICP-8100, Shimadzu). Co, Cu, Fe, Mn, Mo, Ni, Se, and Zn concentrations were measured with ICP Mass Spectrometry (7700x, Agilent technologies, Santa Clara, USA).

<sup>2</sup>TE Mix: Trace element mix, reported by van de Graaf and colleagues [30]. These values are final concentrations in the influent.
